# Supplementary material
Source: Springer Nature journal article supplement (https://www.springermedizin.de/resource/supplementary/12879_2011_1636_MOESM4_ESM.pdf/9442968)

No. of patients

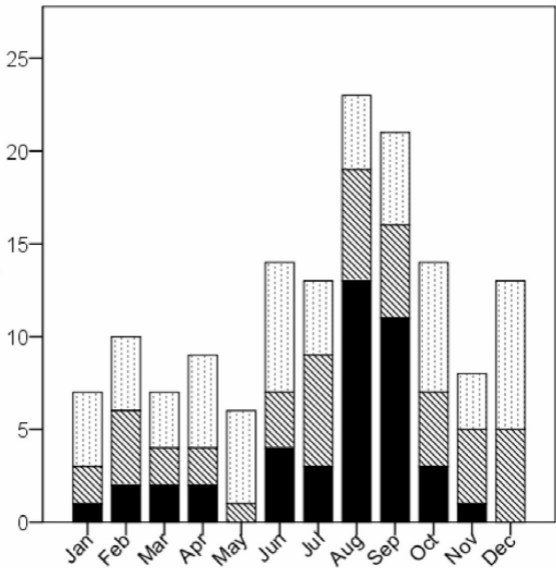

Month of admission

Supplement: MOESM4 [file 9442968]
